# Supplementary material for: Lycopene improves maternal reproductive performance by modulating milk composition and placental antioxidative and immune status
Source: Royal Society of Chemistry journal article supplement (doi:10.1039/d1fo01595h), 2021-01-01
Supplement: d1fo01595h1.pdf [file d1fo01595h1.pdf]

| ID             | Accession  | Gene Name | Sig (LYC_CON) |
|----------------|------------|-----------|---------------|
| AOA287BNK7_PIG | AOA287BNK7 | PLEC      | Up            |
| AOA287A608_PIG | AOA287A608 | AHNAK     | Up            |
| AOA287BB68_PIG | AOA287BB68 | MYH11     | Up            |
| AOA286ZPG4_PIG | AOA286ZPG4 | FLNB      | Up            |
| AOA287A4W0_PIG | AOA287A4W0 | FLNA      | Up            |
| I3LV99_PIG     | I3LV99     | MYH14     | Up            |
| AOA286ZXU2_PIG | AOA286ZXU2 | FLNA      | Up            |
| AOA5G2QM06_PIG | AOA5G2QM06 | FBN2      | Up            |
| AOA286ZXS0_PIG | AOA286ZXS0 | SPTAN1    | Up            |
| AOA287ATP0_PIG | AOA287ATP0 | HSPG2     | Up            |
| AOA286ZHV7_PIG | AOA286ZHV7 | HSPG2     | Up            |
| F1RR78_PIG     | F1RR78     | SPTAN1    | Up            |
| F1SN67_PIG     | F1SN67     | FBN1      | Up            |
| AOA287B9W3_PIG | AOA287B9W3 | DYNC1H1   | Up            |
| AOA287AC34_PIG | AOA287AC34 | TLN1      | Up            |
| F1RQI0_PIG     | F1RQI0     | COL12A1   | Up            |
| AOA286ZPY1_PIG | AOA286ZPY1 | AHNAK     | Up            |
| AOA287B8N2_PIG | AOA287B8N2 | SPTBN1    | Up            |
| AOA286ZNC7_PIG | AOA286ZNC7 | SPTBN1    | Up            |
| F1RW75_PIG     | F1RW75     | DSP       | Up            |
| F1RK90_PIG     | F1RK90     | PPL       | Up            |
| I3LUR7_PIG     | I3LUR7     | COL6A3    | Up            |
| AOA287BDC2_PIG | AOA287BDC2 | MACF1     | Up            |
| AOA286ZY95_PIG | AOA286ZY95 | FN1       | Up            |
| I3LGD4_PIG     | I3LGD4     | CLTC      | Up            |
| F1SS24_PIG     | F1SS24     | FN1       | Up            |
| LRP2_PIG       | COHL13     | LRP2      | Up            |
| VINC_PIG       | P26234     | VCL       | Up            |
| AOA287BLM4_PIG | AOA287BLM4 | COL6A3    | Up            |
| F1RI39_PIG     | F1RI39     | ACTN4     | Up            |
| F1RMJ4_PIG     | F1RMJ4     | IQGAP1    | Up            |
| AOA287A8E9_PIG | AOA287A8E9 | KRT8      | Up            |
| F1S663_PIG     | F1S663     | LAMC1     | Up            |
| AOA480NRZ3_PIG | AOA480NRZ3 | LMNA      | Up            |
| LMNA_PIG       | Q3ZD69     | LMNA      | Up            |
| AOA287BIL8_PIG | AOA287BIL8 | HSPA5     | Up            |
| F1RW07_PIG     | F1RW07     | EVPL      | Up            |
| AOA287A7I2_PIG | AOA287A7I2 | ACTN4     | Up            |
| F1SUX4_PIG     | F1SUX4     | NUMA1     | Up            |
| I3LGC2_PIG     | I3LGC2     | RRBP1     | Up            |
| F1SAE9_PIG     | F1SAE9     | LAMB1     | Up            |
| AOA287AXZ5_PIG | AOA287AXZ5 | CGN       | Up            |
| VIME_PIG       | P02543     | VIM       | Up            |
| AOA287BAZ5_PIG | AOA287BAZ5 | ACTN4     | Up            |
| AOA5G2Q8I9_PIG | AOA5G2Q8I9 | A2M       | Up            |
| F1S300_PIG     | F1S300     | TPR       | Up            |
| AOA287AZ82_PIG | AOA287AZ82 | KRT8      | Up            |
| K9J6K2_PIG     | K9J6K2     | UTRN      | Up            |
| AOA286ZN81_PIG | AOA286ZN81 | NUMA1     | Up            |
| AOA286ZT13_PIG | AOA286ZT13 | ALB       | Up            |
| AOA287A5G1_PIG | AOA287A5G1 | ACTG1     | Up            |
| F1S9Q3_PIG     | F1S9Q3     | HSPA8     | Up            |
| AOA5G2R416_PIG | AOA5G2R416 | TGM2      | Up            |

|                |            |              |      |
|----------------|------------|--------------|------|
| AOA287AG48_PIG | AOA287AG48 | KRT7         | Up   |
| TRFE_PIG       | P09571     | TF           | Up   |
| AOA287BGF1_PIG | AOA287BGF1 | SYNE2        | Up   |
| F1S2H8_PIG     | F1S2H8     | IQGAP2       | Up   |
| F1SAX3_PIG     | F1SAX3     | ATP1A1       | Up   |
| ENPL_PIG       | Q29092     | HSP90B1      | Up   |
| AOA5G2QKZ4_PIG | AOA5G2QKZ4 | ACTC1        | Up   |
| F1S2H7_PIG     | F1S2H7     | IQGAP2       | Up   |
| F1SSA6_PIG     | F1SSA6     | MYH10        | Up   |
| I3LLY3_PIG     | I3LLY3     | ACTN1        | Up   |
| AOA287AWV5_PIG | AOA287AWV5 | LAMB2        | Up   |
| AOA287AKJ2_PIG | AOA287AKJ2 | NID2         | Up   |
| ANXA2_PIG      | P19620     | ANXA2        | Up   |
| AOA287AFA5_PIG | AOA287AFA5 | HSP90B1      | Up   |
| AOA5G2ROX5_PIG | AOA5G2ROX5 | ACTG2        | Up   |
| AOA287B5N7_PIG | AOA287B5N7 | TPM1         | Up   |
| F1SAD9_PIG     | F1SAD9     | PDIA4        | Up   |
| F1RGJ3_PIG     | F1RGJ3     | HSPA9        | Up   |
| F1SOJ8_PIG     | F1SOJ8     | KRT14        | Up   |
| AOA287AD38_PIG | AOA287AD38 | TPM2         | Up   |
| F1SIH8_PIG     | F1SIH8     | VCP          | Up   |
| F6QA08_PIG     | F6QA08     | PDIA3        | Up   |
| F1RQI7_PIG     | F1RQI7     | MYO6         | Up   |
| I3LK87_PIG     | I3LK87     | RBMX2        | Down |
| AOA287BD27_PIG | AOA287BD27 | PLCG1        | Down |
| AOA287AR81_PIG | AOA287AR81 | MRPS31       | Down |
| F1RK97_PIG     | F1RK97     | LOC100153925 | Down |
| AOA287BFA6_PIG | AOA287BFA6 | SEMA6A       | Down |
| AOA5G2QE94_PIG | AOA5G2QE94 | ISLR         | Down |
| AOA286ZV11_PIG | AOA286ZV11 | LOC100736603 | Down |
| AOA287ALG3_PIG | AOA287ALG3 | LOC110257894 | Down |
| F1RL06_PIG     | F1RL06     | LOC100523213 | Down |
| ATP6_PIG       | Q35915     | MT-ATP6      | Down |
| I3L8T3_PIG     | I3L8T3     | TRMT5        | Down |
| F1SHD3_PIG     | F1SHD3     | ZDBF2        | Down |
| F1RUH2_PIG     | F1RUH2     | MBOAT1       | Down |
| AOA287A837_PIG | AOA287A837 | LZIC         | Down |
| I3L9T3_PIG     | I3L9T3     | SPRYD4       | Down |
| AOA287ATK1_PIG | AOA287ATK1 | KIAA0825     | Down |
| AOA287AHC7_PIG | AOA287AHC7 | AKAP17A      | Down |
