# Supplementary material for: Lycopene improves maternal reproductive performance by modulating milk composition and placental antioxidative and immune status
Source: Royal Society of Chemistry journal article supplement (doi:10.1039/d1fo01595h), 2021-01-01
Supplement: d1fo01595h2.pdf [file d1fo01595h2.pdf]

| TermID     | Term                                                                               | bg_pro_num | bg_term_num | fg_pro_num | fg_term_num | Ratio      | pvalue      | Enrichment  | FDR         | IDs                                                                                                                         |
|------------|------------------------------------------------------------------------------------|------------|-------------|------------|-------------|------------|-------------|-------------|-------------|-----------------------------------------------------------------------------------------------------------------------------|
| GO:0010951 | negative regulation of endopeptidase activity                                      | 4650       | 36          | 61         | 10          | 0.27777778 | 1.37E-11    | 10.86386651 | 4.94E-09    | F1SCE4_PIG,F1SFI6_PIG,TIM P1_PIG,A0A287B9R5_PIG,A0A287AT48_PIG,F1SCC9_PIG,A0A5G2R175_PIG,F1SMW6_PIG,PAI1_PIG,A0A287BF75_PIG |
| GO:0050829 | defense response to Gram-negative bacterium                                        | 4650       | 19          | 61         | 6           | 0.31578947 | 9.43E-08    | 7.025606511 | 1.70E-05    | PG2_PIG,LYSC1_PIG,LYSC3_PIG,DBMT1_PIG,A0A287B028_PIG,PAI1_PIG                                                               |
| GO:0050830 | defense response to Gram-positive bacterium                                        | 4650       | 22          | 61         | 6           | 0.27272727 | 2.51E-07    | 6.599561976 | 3.03E-05    | A0A5S8KUU6_PIG,PG2_PIG,LYSC1_PIG,LYSC3_PIG,DBMT1_PIG,A0A287B028_PIG                                                         |
| GO:0015909 | long-chain fatty acid transport                                                    | 4650       | 4           | 61         | 3           | 0.75       | 8.52E-06    | 5.069770055 | 0.000768559 | APOE_PIG,F1RM45_PIG,FABP4_PIG                                                                                               |
| GO:0045087 | innate immune response                                                             | 4650       | 61          | 61         | 6           | 0.09836066 | 0.000125753 | 3.900481454 | 0.009079371 | F1SJB5_PIG,A0A480MVF5_PIG,PG2_PIG,S10AC_PIG,F1S505_PIG,A0A287B028_PIG                                                       |
| GO:2000822 | regulation of behavioral fear response                                             | 4650       | 2           | 61         | 2           | 1          | 0.000169305 | 3.771331414 | 0.010186489 | APOE_PIG,F1RM45_PIG                                                                                                         |
| GO:0071830 | triglyceride-rich lipoprotein particle clearance                                   | 4650       | 2           | 61         | 2           | 1          | 0.000169305 | 3.771331414 | 0.008731277 | APOE_PIG,F1RM45_PIG                                                                                                         |
| GO:0061771 | response to caloric restriction                                                    | 4650       | 2           | 61         | 2           | 1          | 0.000169305 | 3.771331414 | 0.007639867 | APOE_PIG,F1RM45_PIG                                                                                                         |
| GO:1905855 | positive regulation of heparan sulfate binding                                     | 4650       | 2           | 61         | 2           | 1          | 0.000169305 | 3.771331414 | 0.006790993 | APOE_PIG,F1RM45_PIG                                                                                                         |
| GO:0051651 | maintenance of location in cell                                                    | 4650       | 2           | 61         | 2           | 1          | 0.000169305 | 3.771331414 | 0.006111894 | APOE_PIG,F1RM45_PIG                                                                                                         |
| GO:0071831 | intermediate-density lipoprotein particle clearance                                | 4650       | 2           | 61         | 2           | 1          | 0.000169305 | 3.771331414 | 0.005556267 | APOE_PIG,F1RM45_PIG                                                                                                         |
| GO:1905890 | regulation of cellular response to very-low-density lipoprotein particle stimulus  | 4650       | 2           | 61         | 2           | 1          | 0.000169305 | 3.771331414 | 0.005093245 | APOE_PIG,F1RM45_PIG                                                                                                         |
| GO:0090209 | negative regulation of triglyceride metabolic process                              | 4650       | 2           | 61         | 2           | 1          | 0.000169305 | 3.771331414 | 0.004701457 | APOE_PIG,F1RM45_PIG                                                                                                         |
| GO:0002548 | monocyte chemotaxis                                                                | 4650       | 2           | 61         | 2           | 1          | 0.000169305 | 3.771331414 | 0.004365638 | F1SJB5_PIG,A0A5G2R7M4_PIG                                                                                                   |
| GO:0010544 | negative regulation of platelet activation                                         | 4650       | 2           | 61         | 2           | 1          | 0.000169305 | 3.771331414 | 0.004074596 | APOE_PIG,F1RM45_PIG                                                                                                         |
| GO:0032805 | positive regulation of low-density lipoprotein particle receptor catabolic process | 4650       | 2           | 61         | 2           | 1          | 0.000169305 | 3.771331414 | 0.003819934 | APOE_PIG,F1RM45_PIG                                                                                                         |
| GO:0034447 | very-low-density lipoprotein particle clearance                                    | 4650       | 2           | 61         | 2           | 1          | 0.000169305 | 3.771331414 | 0.003595232 | APOE_PIG,F1RM45_PIG                                                                                                         |
| GO:1903002 | positive regulation of lipid transport across blood-brain barrier                  | 4650       | 2           | 61         | 2           | 1          | 0.000169305 | 3.771331414 | 0.003395496 | APOE_PIG,F1RM45_PIG                                                                                                         |
| GO:0007616 | long-term memory                                                                   | 4650       | 2           | 61         | 2           | 1          | 0.000169305 | 3.771331414 | 0.003216786 | APOE_PIG,F1RM45_PIG                                                                                                         |
| GO:0097114 | NMDA glutamate receptor clustering                                                 | 4650       | 2           | 61         | 2           | 1          | 0.000169305 | 3.771331414 | 0.003055947 | APOE_PIG,F1RM45_PIG                                                                                                         |
| GO:1902952 | positive regulation of dendritic spine maintenance                                 | 4650       | 2           | 61         | 2           | 1          | 0.000169305 | 3.771331414 | 0.002910426 | APOE_PIG,F1RM45_PIG                                                                                                         |
| GO:1905860 | positive regulation of heparan sulfate proteoglycan binding                        | 4650       | 2           | 61         | 2           | 1          | 0.000169305 | 3.771331414 | 0.002778133 | APOE_PIG,F1RM45_PIG                                                                                                         |
| GO:0010877 | lipid transport involved in lipid storage                                          | 4650       | 2           | 61         | 2           | 1          | 0.000169305 | 3.771331414 | 0.002657345 | APOE_PIG,F1RM45_PIG                                                                                                         |
| GO:0097113 | AMPA glutamate receptor clustering                                                 | 4650       | 2           | 61         | 2           | 1          | 0.000169305 | 3.771331414 | 0.002546622 | APOE_PIG,F1RM45_PIG                                                                                                         |
| GO:0061844 | antimicrobial humoral immune response mediated by antimicrobial peptide            | 4650       | 11          | 61         | 3           | 0.27272727 | 0.000328939 | 3.482884701 | 0.004749878 | PG2_PIG,S10AC_PIG,F1S505_PIG                                                                                                |
| GO:0030855 | epithelial cell differentiation                                                    | 4650       | 27          | 61         | 4           | 0.14814815 | 0.000375429 | 3.425472037 | 0.005212689 | F1S0J8_PIG,A0A5G2R7M4_PIG,A0A5G2R1T5_PIG,F6Q8K1_PIG                                                                         |
| GO:0010469 | regulation of signaling receptor activity                                          | 4650       | 3           | 61         | 2           | 0.66666667 | 0.000503615 | 3.297900981 | 0.006733525 | A0A287B5M2_PIG,PAI1_PIG                                                                                                     |

|            |                                                                |      |    |    |   |            |             |             |             |                                         |
|------------|----------------------------------------------------------------|------|----|----|---|------------|-------------|-------------|-------------|-----------------------------------------|
| GO:0007586 | digestion                                                      | 4650 | 3  | 61 | 2 | 0.66666667 | 0.000503615 | 3.297900981 | 0.006493042 | LYSC1_PIG,LYSC3_PIG                     |
| GO:0035641 | locomotory exploration behavior                                | 4650 | 3  | 61 | 2 | 0.66666667 | 0.000503615 | 3.297900981 | 0.006269144 | APOE_PIG,F1RM45_PIG                     |
| GO:1900221 | regulation of amyloid-beta clearance                           | 4650 | 3  | 61 | 2 | 0.66666667 | 0.000503615 | 3.297900981 | 0.006060172 | APOE_PIG,F1RM45_PIG                     |
| GO:0002021 | response to dietary excess                                     | 4650 | 3  | 61 | 2 | 0.66666667 | 0.000503615 | 3.297900981 | 0.005864683 | APOE_PIG,F1RM45_PIG                     |
| GO:1902995 | positive regulation of phospholipid efflux                     | 4650 | 3  | 61 | 2 | 0.66666667 | 0.000503615 | 3.297900981 | 0.005681411 | APOE_PIG,F1RM45_PIG                     |
| GO:1900223 | positive regulation of amyloid-beta clearance                  | 4650 | 3  | 61 | 2 | 0.66666667 | 0.000503615 | 3.297900981 | 0.005509247 | APOE_PIG,F1RM45_PIG                     |
| GO:0034384 | high-density lipoprotein particle clearance                    | 4650 | 3  | 61 | 2 | 0.66666667 | 0.000503615 | 3.297900981 | 0.005347211 | APOE_PIG,F1RM45_PIG                     |
| GO:0042982 | amyloid precursor protein metabolic process                    | 4650 | 3  | 61 | 2 | 0.66666667 | 0.000503615 | 3.297900981 | 0.005194433 | APOE_PIG,F1RM45_PIG                     |
| GO:0051045 | negative regulation of membrane protein ectodomain proteolysis | 4650 | 3  | 61 | 2 | 0.66666667 | 0.000503615 | 3.297900981 | 0.005050144 | TIMP1_PIG,A0A5G2R175_PIG                |
| GO:0034097 | response to cytokine                                           | 4650 | 13 | 61 | 3 | 0.23076923 | 0.000559578 | 3.252139216 | 0.005459668 | A0A5S8KUU6_PIG,TIMP1_PIG,A0A5G2R175_PIG |
| GO:0034382 | chylomicron remnant clearance                                  | 4650 | 4  | 61 | 2 | 0.5        | 0.000998715 | 3.000558448 | 0.009487792 | APOE_PIG,F1RM45_PIG                     |
| GO:0042311 | vasodilation                                                   | 4650 | 4  | 61 | 2 | 0.5        | 0.000998715 | 3.000558448 | 0.009244515 | APOE_PIG,F1RM45_PIG                     |
| GO:0042158 | lipoprotein biosynthetic process                               | 4650 | 4  | 61 | 2 | 0.5        | 0.000998715 | 3.000558448 | 0.009013402 | APOE_PIG,F1RM45_PIG                     |
| GO:0017038 | protein import                                                 | 4650 | 4  | 61 | 2 | 0.5        | 0.000998715 | 3.000558448 | 0.008793563 | APOE_PIG,F1RM45_PIG                     |
| GO:0044794 | positive regulation by host of viral process                   | 4650 | 4  | 61 | 2 | 0.5        | 0.000998715 | 3.000558448 | 0.008584193 | APOE_PIG,F1RM45_PIG                     |
| GO:0045541 | negative regulation of cholesterol biosynthetic process        | 4650 | 4  | 61 | 2 | 0.5        | 0.000998715 | 3.000558448 | 0.00838456  | APOE_PIG,F1RM45_PIG                     |
| GO:0051000 | positive regulation of nitric-oxide synthase activity          | 4650 | 4  | 61 | 2 | 0.5        | 0.000998715 | 3.000558448 | 0.008194002 | APOE_PIG,F1RM45_PIG                     |
| GO:0019835 | cytolysis                                                      | 4650 | 4  | 61 | 2 | 0.5        | 0.000998715 | 3.000558448 | 0.008011913 | LYSC1_PIG,LYSC3_PIG                     |
| GO:1905907 | negative regulation of amyloid fibril formation                | 4650 | 4  | 61 | 2 | 0.5        | 0.000998715 | 3.000558448 | 0.007837741 | APOE_PIG,F1RM45_PIG                     |
| GO:0009612 | response to mechanical stimulus                                | 4650 | 4  | 61 | 2 | 0.5        | 0.000998715 | 3.000558448 | 0.007670981 | F1RK90_PIG,F1RP76_PIG                   |
| GO:0050709 | negative regulation of protein secretion                       | 4650 | 5  | 61 | 2 | 0.4        | 0.001650465 | 2.782393793 | 0.012412869 | APOE_PIG,F1RM45_PIG                     |
| GO:0048844 | artery morphogenesis                                           | 4650 | 5  | 61 | 2 | 0.4        | 0.001650465 | 2.782393793 | 0.012159545 | APOE_PIG,F1RM45_PIG                     |
| GO:0008152 | metabolic process                                              | 4650 | 5  | 61 | 2 | 0.4        | 0.001650465 | 2.782393793 | 0.011916354 | LYSC1_PIG,LYSC3_PIG                     |
| GO:0043254 | regulation of protein-containing complex assembly              | 4650 | 5  | 61 | 2 | 0.4        | 0.001650465 | 2.782393793 | 0.0116827   | APOE_PIG,F1RM45_PIG                     |
| GO:0034372 | very-low-density lipoprotein particle remodeling               | 4650 | 5  | 61 | 2 | 0.4        | 0.001650465 | 2.782393793 | 0.011458033 | APOE_PIG,F1RM45_PIG                     |
| GO:0006707 | cholesterol catabolic process                                  | 4650 | 5  | 61 | 2 | 0.4        | 0.001650465 | 2.782393793 | 0.011241844 | APOE_PIG,F1RM45_PIG                     |
| GO:0043537 | negative regulation of blood vessel endothelial cell migration | 4650 | 5  | 61 | 2 | 0.4        | 0.001650465 | 2.782393793 | 0.011033661 | APOE_PIG,F1RM45_PIG                     |
| GO:0051044 | positive regulation of membrane protein ectodomain proteolysis | 4650 | 5  | 61 | 2 | 0.4        | 0.001650465 | 2.782393793 | 0.010833049 | APOE_PIG,F1RM45_PIG                     |
| GO:0045088 | regulation of innate immune                                    | 4650 | 5  | 61 | 2 | 0.4        | 0.001650465 | 2.782393793 | 0.010639602 | APOE_PIG,F1RM45_PIG                     |
| GO:0019934 | cGMP-mediated signaling                                        | 4650 | 5  | 61 | 2 | 0.4        | 0.001650465 | 2.782393793 | 0.010452942 | APOE_PIG,F1RM45_PIG                     |
| GO:0042159 | lipoprotein catabolic process                                  | 4650 | 5  | 61 | 2 | 0.4        | 0.001650465 | 2.782393793 | 0.010272719 | APOE_PIG,F1RM45_PIG                     |
| GO:0007263 | nitric oxide mediated signal transduction                      | 4650 | 5  | 61 | 2 | 0.4        | 0.001650465 | 2.782393793 | 0.010098605 | APOE_PIG,F1RM45_PIG                     |
| GO:0034374 | low-density lipoprotein particle remodeling                    | 4650 | 5  | 61 | 2 | 0.4        | 0.001650465 | 2.782393793 | 0.009930295 | APOE_PIG,F1RM45_PIG                     |

|            |                                                                               |      |    |    |   |            |             |             |             |                                    |
|------------|-------------------------------------------------------------------------------|------|----|----|---|------------|-------------|-------------|-------------|------------------------------------|
| GO:0060999 | positive regulation of dendritic spine development                            | 4650 | 5  | 61 | 2 | 0.4        | 0.001650465 | 2.782393793 | 0.009767503 | APOE_PIG,F1RM45_PIG                |
| GO:0019068 | virion assembly                                                               | 4650 | 5  | 61 | 2 | 0.4        | 0.001650465 | 2.782393793 | 0.009609963 | APOE_PIG,F1RM45_PIG                |
| GO:0032489 | regulation of Cdc42 protein signal transduction                               | 4650 | 6  | 61 | 2 | 0.33333333 | 0.002454804 | 2.609983251 | 0.014066414 | APOE_PIG,F1RM45_PIG                |
| GO:0034380 | high-density lipoprotein particle assembly                                    | 4650 | 6  | 61 | 2 | 0.33333333 | 0.002454804 | 2.609983251 | 0.013846626 | APOE_PIG,F1RM45_PIG                |
| GO:1900272 | negative regulation of long-term synaptic potentiation                        | 4650 | 6  | 61 | 2 | 0.33333333 | 0.002454804 | 2.609983251 | 0.013633601 | APOE_PIG,F1RM45_PIG                |
| GO:0043691 | reverse cholesterol transport                                                 | 4650 | 6  | 61 | 2 | 0.33333333 | 0.002454804 | 2.609983251 | 0.013427032 | APOE_PIG,F1RM45_PIG                |
| GO:0055089 | fatty acid homeostasis                                                        | 4650 | 6  | 61 | 2 | 0.33333333 | 0.002454804 | 2.609983251 | 0.013226628 | APOE_PIG,F1RM45_PIG                |
| GO:0010033 | response to organic substance                                                 | 4650 | 6  | 61 | 2 | 0.33333333 | 0.002454804 | 2.609983251 | 0.013032119 | TIMP1_PIG,A0A5G2R175_PIG           |
| GO:0034375 | high-density lipoprotein particle remodeling                                  | 4650 | 6  | 61 | 2 | 0.33333333 | 0.002454804 | 2.609983251 | 0.012843248 | APOE_PIG,F1RM45_PIG                |
| GO:0010873 | positive regulation of cholesterol esterification                             | 4650 | 7  | 61 | 2 | 0.28571429 | 0.003407748 | 2.467532546 | 0.017574243 | APOE_PIG,F1RM45_PIG                |
| GO:0010467 | gene expression                                                               | 4650 | 7  | 61 | 2 | 0.28571429 | 0.003407748 | 2.467532546 | 0.017326718 | APOE_PIG,F1RM45_PIG                |
| GO:0033700 | phospholipid efflux                                                           | 4650 | 7  | 61 | 2 | 0.28571429 | 0.003407748 | 2.467532546 | 0.017086069 | APOE_PIG,F1RM45_PIG                |
| GO:0070328 | triglyceride homeostasis                                                      | 4650 | 7  | 61 | 2 | 0.28571429 | 0.003407748 | 2.467532546 | 0.016852013 | APOE_PIG,F1RM45_PIG                |
| GO:0019731 | antibacterial humoral response                                                | 4650 | 7  | 61 | 2 | 0.28571429 | 0.003407748 | 2.467532546 | 0.016624283 | A0A480MV5_PIG,F1S505_PIG           |
| GO:0050728 | negative regulation of inflammatory response                                  | 4650 | 24 | 61 | 3 | 0.125      | 0.003573508 | 2.446905206 | 0.017200487 | APOE_PIG,F1RM45_PIG,A0A5S8KUU6_PIG |
| GO:0006874 | cellular calcium ion homeostasis                                              | 4650 | 25 | 61 | 3 | 0.12       | 0.004023173 | 2.395431345 | 0.019110069 | APOE_PIG,F1RM45_PIG,A0A5S6HMA0_PIG |
| GO:0006952 | defense response                                                              | 4650 | 8  | 61 | 2 | 0.25       | 0.004505389 | 2.346267743 | 0.021122666 | A0A287AFU9_PIG,Q0Z8R0_PIG          |
| GO:0006953 | acute-phase response                                                          | 4650 | 8  | 61 | 2 | 0.25       | 0.004505389 | 2.346267743 | 0.020851863 | HPT_PIG,A0A287B028_PIG             |
| GO:0045807 | positive regulation of endocytosis                                            | 4650 | 8  | 61 | 2 | 0.25       | 0.004505389 | 2.346267743 | 0.020587915 | APOE_PIG,F1RM45_PIG                |
| GO:0046889 | positive regulation of lipid biosynthetic                                     | 4650 | 8  | 61 | 2 | 0.25       | 0.004505389 | 2.346267743 | 0.020330566 | APOE_PIG,F1RM45_PIG                |
| GO:0002250 | adaptive immune response                                                      | 4650 | 9  | 61 | 2 | 0.22222222 | 0.005743891 | 2.240793801 | 0.025599317 | F1SJB5_PIG,CATL1_PIG               |
| GO:1902430 | negative regulation of amyloid-beta formation                                 | 4650 | 9  | 61 | 2 | 0.22222222 | 0.005743891 | 2.240793801 | 0.02528713  | APOE_PIG,F1RM45_PIG                |
| GO:0032757 | positive regulation of interleukin-8 production                               | 4650 | 9  | 61 | 2 | 0.22222222 | 0.005743891 | 2.240793801 | 0.024982466 | A0A287B028_PIG,PAI1_PIG            |
| GO:0061136 | regulation of proteasomal protein catabolic process                           | 4650 | 9  | 61 | 2 | 0.22222222 | 0.005743891 | 2.240793801 | 0.024685056 | APOE_PIG,F1RM45_PIG                |
| GO:0042632 | cholesterol homeostasis                                                       | 4650 | 29 | 61 | 3 | 0.10344828 | 0.006158231 | 2.210544054 | 0.026154368 | APOE_PIG,F1RM45_PIG,FABP4_PIG      |
| GO:0009725 | response to hormone                                                           | 4650 | 10 | 61 | 2 | 0.2        | 0.007119494 | 2.1475509   | 0.029885316 | TIMP1_PIG,A0A5G2R175_PIG           |
| GO:0010875 | positive regulation of cholesterol efflux                                     | 4650 | 10 | 61 | 2 | 0.2        | 0.007119494 | 2.1475509   | 0.029541807 | APOE_PIG,F1RM45_PIG                |
| GO:0033344 | cholesterol efflux                                                            | 4650 | 10 | 61 | 2 | 0.2        | 0.007119494 | 2.1475509   | 0.029206104 | APOE_PIG,F1RM45_PIG                |
| GO:0055072 | iron ion homeostasis                                                          | 4650 | 11 | 61 | 2 | 0.18181818 | 0.008628506 | 2.064064411 | 0.03499877  | A0A5S8KUU6_PIG,A0A5G2QW05_PIG      |
| GO:0001937 | negative regulation of endothelial cell proliferation                         | 4650 | 12 | 61 | 2 | 0.16666667 | 0.010267308 | 1.988543418 | 0.041183312 | APOE_PIG,F1RM45_PIG                |
| GO:0006641 | triglyceride metabolic process                                                | 4650 | 12 | 61 | 2 | 0.16666667 | 0.010267308 | 1.988543418 | 0.040730749 | APOE_PIG,F1RM45_PIG                |
| GO:0010977 | negative regulation of neuron projection development                          | 4650 | 13 | 61 | 2 | 0.15384615 | 0.01203235  | 1.91964956  | 0.047213893 | APOE_PIG,F1RM45_PIG                |
| GO:0002248 | connective tissue replacement involved in inflammatory response wound healing | 4650 | 1  | 61 | 1 | 1          | 0.01311828  | 1.882123118 | 0.050921494 | TIMP1_PIG                          |
| GO:0046883 | regulation of hormone secretion                                               | 4650 | 1  | 61 | 1 | 1          | 0.01311828  | 1.882123118 | 0.050379776 | F1SJB5_PIG                         |

|            |                                                                                 |      |   |    |   |   |            |             |             |                |
|------------|---------------------------------------------------------------------------------|------|---|----|---|---|------------|-------------|-------------|----------------|
| GO:1903278 | positive regulation of sodium ion export across plasma membrane                 | 4650 | 1 | 61 | 1 | 1 | 0.01311828 | 1.882123118 | 0.049849462 | A0A5S6HMA0_PIG |
| GO:1905049 | negative regulation of metalloproteinase activity                               | 4650 | 1 | 61 | 1 | 1 | 0.01311828 | 1.882123118 | 0.049330197 | TIMP1_PIG      |
| GO:2001044 | regulation of integrin-mediated signaling pathway                               | 4650 | 1 | 61 | 1 | 1 | 0.01311828 | 1.882123118 | 0.048821638 | TIMP1_PIG      |
| GO:0072719 | cellular response to cisplatin                                                  | 4650 | 1 | 61 | 1 | 1 | 0.01311828 | 1.882123118 | 0.048323458 | A0A287ACN2_PIG |
| GO:0010711 | negative regulation of collagen catabolic process                               | 4650 | 1 | 61 | 1 | 1 | 0.01311828 | 1.882123118 | 0.047835343 | Q0Z8R0_PIG     |
| GO:0071621 | granulocyte chemotaxis                                                          | 4650 | 1 | 61 | 1 | 1 | 0.01311828 | 1.882123118 | 0.047356989 | F1SJB5_PIG     |
| GO:0097187 | dentinogenesis                                                                  | 4650 | 1 | 61 | 1 | 1 | 0.01311828 | 1.882123118 | 0.046888108 | PAI1_PIG       |
| GO:0061044 | negative regulation of vascular wound healing                                   | 4650 | 1 | 61 | 1 | 1 | 0.01311828 | 1.882123118 | 0.046428421 | PAI1_PIG       |
| GO:0070232 | regulation of T cell apoptotic process                                          | 4650 | 1 | 61 | 1 | 1 | 0.01311828 | 1.882123118 | 0.045977659 | A0A5G2R7M4_PIG |
| GO:0030850 | prostate gland development                                                      | 4650 | 1 | 61 | 1 | 1 | 0.01311828 | 1.882123118 | 0.045535567 | F1SJB5_PIG     |
| GO:0002685 | regulation of leukocyte migration                                               | 4650 | 1 | 61 | 1 | 1 | 0.01311828 | 1.882123118 | 0.045101895 | F1SJB5_PIG     |
| GO:0014839 | myoblast migration involved in skeletal muscle regeneration                     | 4650 | 1 | 61 | 1 | 1 | 0.01311828 | 1.882123118 | 0.044676405 | F1SJB5_PIG     |
| GO:0032652 | regulation of interleukin-1 production                                          | 4650 | 1 | 61 | 1 | 1 | 0.01311828 | 1.882123118 | 0.044258868 | F1SJB5_PIG     |
| GO:0032691 | negative regulation of interleukin-1 beta production                            | 4650 | 1 | 61 | 1 | 1 | 0.01311828 | 1.882123118 | 0.043849064 | A0A5S8KUU6_PIG |
| GO:0034633 | retinol transport                                                               | 4650 | 1 | 61 | 1 | 1 | 0.01311828 | 1.882123118 | 0.043446779 | A0A287A3Z4_PIG |
| GO:0098737 | protein insertion into plasma membrane                                          | 4650 | 1 | 61 | 1 | 1 | 0.01311828 | 1.882123118 | 0.043051808 | F1SU64_PIG     |
| GO:0035491 | positive regulation of leukotriene production involved in inflammatory response | 4650 | 1 | 61 | 1 | 1 | 0.01311828 | 1.882123118 | 0.042663954 | PAI1_PIG       |
| GO:0060265 | positive regulation of respiratory burst involved in inflammatory response      | 4650 | 1 | 61 | 1 | 1 | 0.01311828 | 1.882123118 | 0.042283026 | A0A287B028_PIG |
| GO:0032929 | negative regulation of superoxide anion generation                              | 4650 | 1 | 61 | 1 | 1 | 0.01311828 | 1.882123118 | 0.04190884  | A0A5S8KUU6_PIG |
| GO:0002526 | acute inflammatory response                                                     | 4650 | 1 | 61 | 1 | 1 | 0.01311828 | 1.882123118 | 0.041541219 | HPT_PIG        |
| GO:0032490 | detection of molecule of bacterial origin                                       | 4650 | 1 | 61 | 1 | 1 | 0.01311828 | 1.882123118 | 0.041179991 | A0A287B028_PIG |
| GO:1902305 | regulation of sodium ion transmembrane transport                                | 4650 | 1 | 61 | 1 | 1 | 0.01311828 | 1.882123118 | 0.040824991 | F1S505_PIG     |
| GO:0008016 | regulation of heart contraction                                                 | 4650 | 1 | 61 | 1 | 1 | 0.01311828 | 1.882123118 | 0.040476059 | K7GQ50_PIG     |
| GO:0060311 | negative regulation of elastin catabolic process                                | 4650 | 1 | 61 | 1 | 1 | 0.01311828 | 1.882123118 | 0.040133042 | Q0Z8R0_PIG     |
| GO:1901331 | positive regulation of odontoblast differentiation                              | 4650 | 1 | 61 | 1 | 1 | 0.01311828 | 1.882123118 | 0.039795789 | PAI1_PIG       |
| GO:0045919 | positive regulation of cytolysis                                                | 4650 | 1 | 61 | 1 | 1 | 0.01311828 | 1.882123118 | 0.039464158 | A0A287B028_PIG |
| GO:0045627 | positive regulation of T-helper 1 cell differentiation                          | 4650 | 1 | 61 | 1 | 1 | 0.01311828 | 1.882123118 | 0.039138008 | F1SJB5_PIG     |
| GO:0070171 | negative regulation of tooth mineralization                                     | 4650 | 1 | 61 | 1 | 1 | 0.01311828 | 1.882123118 | 0.038817204 | F1SUE4_PIG     |
| GO:0050828 | regulation of liquid surface tension                                            | 4650 | 1 | 61 | 1 | 1 | 0.01311828 | 1.882123118 | 0.038501617 | F1S505_PIG     |

|            |                                                                         |      |    |    |   |            |             |             |             |                               |
|------------|-------------------------------------------------------------------------|------|----|----|---|------------|-------------|-------------|-------------|-------------------------------|
| GO:0071478 | cellular response to radiation                                          | 4650 | 1  | 61 | 1 | 1          | 0.01311828  | 1.882123118 | 0.03819112  | A0A287ACN2_PIG                |
| GO:2001023 | regulation of response to drug                                          | 4650 | 1  | 61 | 1 | 1          | 0.01311828  | 1.882123118 | 0.037885591 | A0A287ACN2_PIG                |
| GO:0014912 | negative regulation of smooth muscle cell migration                     | 4650 | 1  | 61 | 1 | 1          | 0.01311828  | 1.882123118 | 0.037584912 | PAI1_PIG                      |
| GO:0045629 | negative regulation of T-helper 2 cell differentiation                  | 4650 | 1  | 61 | 1 | 1          | 0.01311828  | 1.882123118 | 0.037288968 | F1SJB5_PIG                    |
| GO:0015920 | lipopolysaccharide transport                                            | 4650 | 1  | 61 | 1 | 1          | 0.01311828  | 1.882123118 | 0.036997648 | A0A287B028_PIG                |
| GO:1903896 | positive regulation of IRE1-mediated unfolded protein response          | 4650 | 1  | 61 | 1 | 1          | 0.01311828  | 1.882123118 | 0.036710844 | A0A287AM82_PIG                |
| GO:0060480 | lung goblet cell differentiation                                        | 4650 | 1  | 61 | 1 | 1          | 0.01311828  | 1.882123118 | 0.036428453 | A0A287AM82_PIG                |
| GO:0035821 | modulation of process of other organism                                 | 4650 | 1  | 61 | 1 | 1          | 0.01311828  | 1.882123118 | 0.036150373 | A0A480MVF5_PIG                |
| GO:0042129 | regulation of T cell proliferation                                      | 4650 | 1  | 61 | 1 | 1          | 0.01311828  | 1.882123118 | 0.035876507 | A0A5G2R7M4_PIG                |
| GO:0070346 | positive regulation of fat cell proliferation                           | 4650 | 1  | 61 | 1 | 1          | 0.01311828  | 1.882123118 | 0.035606759 | FABP4_PIG                     |
| GO:0002395 | immune response in nasopharyngeal-associated lymphoid tissue            | 4650 | 1  | 61 | 1 | 1          | 0.01311828  | 1.882123118 | 0.035341037 | F1S505_PIG                    |
| GO:0048245 | eosinophil chemotaxis                                                   | 4650 | 1  | 61 | 1 | 1          | 0.01311828  | 1.882123118 | 0.035079251 | A0A5G2R7M4_PIG                |
| GO:0071677 | positive regulation of mononuclear cell migration                       | 4650 | 1  | 61 | 1 | 1          | 0.01311828  | 1.882123118 | 0.034821316 | A0A5G2R7M4_PIG                |
| GO:0032720 | negative regulation of tumor necrosis factor production                 | 4650 | 14 | 61 | 2 | 0.14285714 | 0.013920149 | 1.856356126 | 0.0366801   | A0A5S8KUU6_PIG,A0A287B028_PIG |
| GO:0043407 | negative regulation of MAP kinase activity                              | 4650 | 17 | 61 | 2 | 0.11764706 | 0.020286267 | 1.692797865 | 0.053067698 | APOE_PIG,F1RM45_PIG           |
| GO:0032496 | response to lipopolysaccharide                                          | 4650 | 19 | 61 | 2 | 0.10526316 | 0.025083258 | 1.600616063 | 0.065144288 | A0A5S8KUU6_PIG,A0A480MVF5_PIG |
| GO:2000483 | negative regulation of interleukin-8 secretion                          | 4650 | 2  | 61 | 1 | 0.5        | 0.026067255 | 1.583904706 | 0.067216278 | F1SJB5_PIG                    |
| GO:0086009 | membrane repolarization                                                 | 4650 | 2  | 61 | 1 | 0.5        | 0.026067255 | 1.583904706 | 0.066739567 | A0A5S6HMA0_PIG                |
| GO:0070459 | prolactin secretion                                                     | 4650 | 2  | 61 | 1 | 0.5        | 0.026067255 | 1.583904706 | 0.06626957  | F1SJB5_PIG                    |
| GO:0007187 | G protein-coupled receptor signaling pathway                            | 4650 | 2  | 61 | 1 | 0.5        | 0.026067255 | 1.583904706 | 0.065806146 | F1SJB5_PIG                    |
| GO:0001300 | chronological cell aging                                                | 4650 | 2  | 61 | 1 | 0.5        | 0.026067255 | 1.583904706 | 0.065349159 | PAI1_PIG                      |
| GO:0050896 | response to stimulus                                                    | 4650 | 2  | 61 | 1 | 0.5        | 0.026067255 | 1.583904706 | 0.064898475 | OBP_PIG                       |
| GO:0031394 | positive regulation of prostaglandin biosynthetic process               | 4650 | 2  | 61 | 1 | 0.5        | 0.026067255 | 1.583904706 | 0.064453965 | F1SJB5_PIG                    |
| GO:1901018 | positive regulation of potassium ion transmembrane transporter activity | 4650 | 2  | 61 | 1 | 0.5        | 0.026067255 | 1.583904706 | 0.064015503 | A0A5S6HMA0_PIG                |
| GO:0002377 | immunoglobulin production                                               | 4650 | 2  | 61 | 1 | 0.5        | 0.026067255 | 1.583904706 | 0.063582966 | A0A075B7I9_PIG                |
| GO:0032695 | negative regulation of interleukin-12 production                        | 4650 | 2  | 61 | 1 | 0.5        | 0.026067255 | 1.583904706 | 0.063156234 | A0A5S8KUU6_PIG                |
| GO:0046632 | alpha-beta T cell differentiation                                       | 4650 | 2  | 61 | 1 | 0.5        | 0.026067255 | 1.583904706 | 0.062735193 | F1SJB5_PIG                    |
| GO:0071918 | urea transmembrane transport                                            | 4650 | 2  | 61 | 1 | 0.5        | 0.026067255 | 1.583904706 | 0.062319728 | F1RPU5_PIG                    |
| GO:0010165 | response to X-ray                                                       | 4650 | 2  | 61 | 1 | 0.5        | 0.026067255 | 1.583904706 | 0.06190973  | F1SJB5_PIG                    |
| GO:0048246 | macrophage chemotaxis                                                   | 4650 | 2  | 61 | 1 | 0.5        | 0.026067255 | 1.583904706 | 0.061505091 | A0A5G2R7M4_PIG                |
| GO:1900138 | negative regulation of phospholipase A2 activity                        | 4650 | 2  | 61 | 1 | 0.5        | 0.026067255 | 1.583904706 | 0.061105707 | F1SJB5_PIG                    |
| GO:0090399 | replicative senescence                                                  | 4650 | 2  | 61 | 1 | 0.5        | 0.026067255 | 1.583904706 | 0.060711477 | PAI1_PIG                      |

|            |                                                                                |      |    |    |   |            |             |             |             |                               |
|------------|--------------------------------------------------------------------------------|------|----|----|---|------------|-------------|-------------|-------------|-------------------------------|
| GO:1900229 | negative regulation of single-species biofilm formation in or on host organism | 4650 | 2  | 61 | 1 | 0.5        | 0.026067255 | 1.583904706 | 0.060322301 | F1S505_PIG                    |
| GO:0043086 | negative regulation of catalytic activity                                      | 4650 | 2  | 61 | 1 | 0.5        | 0.026067255 | 1.583904706 | 0.059938082 | TIMP1_PIG                     |
| GO:0070365 | hepatocyte differentiation                                                     | 4650 | 2  | 61 | 1 | 0.5        | 0.026067255 | 1.583904706 | 0.059558727 | F1SJB5_PIG                    |
| GO:0030277 | maintenance of gastrointestinal epithelium                                     | 4650 | 2  | 61 | 1 | 0.5        | 0.026067255 | 1.583904706 | 0.059184144 | A0A287A3Z4_PIG                |
| GO:0031018 | endocrine pancreas development                                                 | 4650 | 2  | 61 | 1 | 0.5        | 0.026067255 | 1.583904706 | 0.058814243 | F1SJB5_PIG                    |
| GO:0070254 | mucus secretion                                                                | 4650 | 2  | 61 | 1 | 0.5        | 0.026067255 | 1.583904706 | 0.058448937 | A0A287AM82_PIG                |
| GO:1902041 | regulation of extrinsic apoptotic signaling pathway via death domain receptors | 4650 | 2  | 61 | 1 | 0.5        | 0.026067255 | 1.583904706 | 0.058088141 | A0A5G2R7M4_PIG                |
| GO:0009792 | embryo development ending in birth or egg hatching                             | 4650 | 2  | 61 | 1 | 0.5        | 0.026067255 | 1.583904706 | 0.057731772 | F1RP76_PIG                    |
| GO:0050891 | multicellular organismal water homeostasis                                     | 4650 | 2  | 61 | 1 | 0.5        | 0.026067255 | 1.583904706 | 0.057379749 | F1S505_PIG                    |
| GO:0002232 | leukocyte chemotaxis involved in inflammatory response                         | 4650 | 2  | 61 | 1 | 0.5        | 0.026067255 | 1.583904706 | 0.057031993 | A0A287B028_PIG                |
| GO:0044849 | estrous cycle                                                                  | 4650 | 2  | 61 | 1 | 0.5        | 0.026067255 | 1.583904706 | 0.056688427 | F1SJB5_PIG                    |
| GO:2000098 | negative regulation of smooth muscle cell-matrix adhesion                      | 4650 | 2  | 61 | 1 | 0.5        | 0.026067255 | 1.583904706 | 0.056348976 | PAI1_PIG                      |
| GO:0048639 | positive regulation of developmental growth                                    | 4650 | 2  | 61 | 1 | 0.5        | 0.026067255 | 1.583904706 | 0.056013565 | A0A287AM82_PIG                |
| GO:0033031 | positive regulation of neutrophil apoptotic process                            | 4650 | 2  | 61 | 1 | 0.5        | 0.026067255 | 1.583904706 | 0.055682124 | F1SJB5_PIG                    |
| GO:0031247 | actin rod assembly                                                             | 4650 | 2  | 61 | 1 | 0.5        | 0.026067255 | 1.583904706 | 0.055354582 | A0A287AFA5_PIG                |
| GO:0045920 | negative regulation of exocytosis                                              | 4650 | 2  | 61 | 1 | 0.5        | 0.026067255 | 1.583904706 | 0.055030871 | F1SJB5_PIG                    |
| GO:1903899 | positive regulation of PERK-mediated unfolded protein response                 | 4650 | 2  | 61 | 1 | 0.5        | 0.026067255 | 1.583904706 | 0.054710924 | A0A287AM82_PIG                |
| GO:1903288 | positive regulation of potassium ion import across plasma membrane             | 4650 | 2  | 61 | 1 | 0.5        | 0.026067255 | 1.583904706 | 0.054394676 | A0A5S6HMA0_PIG                |
| GO:1903281 | positive regulation of calcium                                                 | 4650 | 2  | 61 | 1 | 0.5        | 0.026067255 | 1.583904706 | 0.054082063 | A0A5S6HMA0_PIG                |
| GO:0030216 | keratinocyte differentiation                                                   | 4650 | 20 | 61 | 2 | 0.1        | 0.027638151 | 1.558491013 | 0.057013557 | F1SJB5_PIG,F1RP76_PIG         |
| GO:0043524 | negative regulation of neuron apoptotic process                                | 4650 | 20 | 61 | 2 | 0.1        | 0.027638151 | 1.558491013 | 0.056689617 | APOE_PIG,F1RM45_PIG           |
| GO:0009617 | response to bacterium                                                          | 4650 | 23 | 61 | 2 | 0.08695652 | 0.035892171 | 1.445000269 | 0.073203807 | FABP4_PIG,F6Q8K1_PIG          |
| GO:1903078 | positive regulation of protein localization to plasma membrane                 | 4650 | 23 | 61 | 2 | 0.08695652 | 0.035892171 | 1.445000269 | 0.07279255  | A0A5G2R7M4_PIG,A0A287AM82_PIG |
| GO:0007186 | G protein-coupled receptor signaling pathway                                   | 4650 | 24 | 61 | 2 | 0.08333333 | 0.038830232 | 1.41083002  | 0.078311249 | APOE_PIG,F1RM45_PIG           |
| GO:0090280 | positive regulation of calcium ion import                                      | 4650 | 3  | 61 | 1 | 0.33333333 | 0.038849074 | 1.410619326 | 0.077913977 | A0A5G2R7M4_PIG                |
| GO:0071385 | cellular response to glucocorticoid stimulus                                   | 4650 | 3  | 61 | 1 | 0.33333333 | 0.038849074 | 1.410619326 | 0.077483513 | F1SJB5_PIG                    |
| GO:0090435 | protein localization to nuclear envelope                                       | 4650 | 3  | 61 | 1 | 0.33333333 | 0.038849074 | 1.410619326 | 0.077057779 | A0A287AGQ8_PIG                |
| GO:0010248 | establishment or maintenance of transmembrane electrochemical gradient         | 4650 | 3  | 61 | 1 | 0.33333333 | 0.038849074 | 1.410619326 | 0.076636698 | A0A5S6HMA0_PIG                |

|            |                                                                   |      |    |    |   |            |             |             |             |                               |
|------------|-------------------------------------------------------------------|------|----|----|---|------------|-------------|-------------|-------------|-------------------------------|
| GO:0048546 | digestive tract morphogenesis                                     | 4650 | 3  | 61 | 1 | 0.33333333 | 0.038849074 | 1.410619326 | 0.076220194 | A0A287AM82_PIG                |
| GO:0033629 | negative regulation of cell adhesion mediated by integrin         | 4650 | 3  | 61 | 1 | 0.33333333 | 0.038849074 | 1.410619326 | 0.075808193 | PAI1_PIG                      |
| GO:0006814 | sodium ion transport                                              | 4650 | 3  | 61 | 1 | 0.33333333 | 0.038849074 | 1.410619326 | 0.075400623 | A0A5S6HMA0_PIG                |
| GO:0010716 | negative regulation of extracellular matrix disassembly           | 4650 | 3  | 61 | 1 | 0.33333333 | 0.038849074 | 1.410619326 | 0.074997411 | Q0Z8R0_PIG                    |
| GO:0002281 | macrophage activation involved in immune response                 | 4650 | 3  | 61 | 1 | 0.33333333 | 0.038849074 | 1.410619326 | 0.074598488 | A0A287B028_PIG                |
| GO:0032722 | positive regulation of chemokine production                       | 4650 | 3  | 61 | 1 | 0.33333333 | 0.038849074 | 1.410619326 | 0.074203787 | A0A287B028_PIG                |
| GO:0042063 | gliogenesis                                                       | 4650 | 3  | 61 | 1 | 0.33333333 | 0.038849074 | 1.410619326 | 0.073813241 | F1SJB5_PIG                    |
| GO:0097435 | supramolecular fiber organization                                 | 4650 | 3  | 61 | 1 | 0.33333333 | 0.038849074 | 1.410619326 | 0.073426784 | Q0Z8R0_PIG                    |
| GO:0002175 | protein localization to paranode region of axon                   | 4650 | 3  | 61 | 1 | 0.33333333 | 0.038849074 | 1.410619326 | 0.073044353 | F1SU64_PIG                    |
| GO:0015840 | urea transport                                                    | 4650 | 3  | 61 | 1 | 0.33333333 | 0.038849074 | 1.410619326 | 0.072665885 | F1RPU5_PIG                    |
| GO:0034144 | negative regulation of toll-like receptor 4 signaling pathway     | 4650 | 3  | 61 | 1 | 0.33333333 | 0.038849074 | 1.410619326 | 0.072291318 | A7J149_PIG                    |
| GO:0097350 | neutrophil clearance                                              | 4650 | 3  | 61 | 1 | 0.33333333 | 0.038849074 | 1.410619326 | 0.071920594 | F1SJB5_PIG                    |
| GO:0090023 | positive regulation of neutrophil chemotaxis                      | 4650 | 3  | 61 | 1 | 0.33333333 | 0.038849074 | 1.410619326 | 0.071553652 | A0A287B028_PIG                |
| GO:0010882 | regulation of cardiac muscle contraction by calcium ion signaling | 4650 | 3  | 61 | 1 | 0.33333333 | 0.038849074 | 1.410619326 | 0.071190435 | A0A5S6HMA0_PIG                |
| GO:0034145 | positive regulation of toll-like receptor 4 signaling pathway     | 4650 | 3  | 61 | 1 | 0.33333333 | 0.038849074 | 1.410619326 | 0.070830888 | A0A287B028_PIG                |
| GO:0051666 | actin cortical patch localization                                 | 4650 | 3  | 61 | 1 | 0.33333333 | 0.038849074 | 1.410619326 | 0.070474954 | A0A5G2QKX8_PIG                |
| GO:0060313 | negative regulation of blood vessel remodeling                    | 4650 | 3  | 61 | 1 | 0.33333333 | 0.038849074 | 1.410619326 | 0.070122579 | Q0Z8R0_PIG                    |
| GO:0006898 | receptor-mediated endocytosis                                     | 4650 | 26 | 61 | 2 | 0.07692308 | 0.044969526 | 1.347081691 | 0.080766164 | APOE_PIG,F1RM45_PIG           |
| GO:0006955 | immune response                                                   | 4650 | 26 | 61 | 2 | 0.07692308 | 0.044969526 | 1.347081691 | 0.080366331 | A0A480MVF5_PIG,A0A075B7I9_PIG |
| GO:0090090 | negative regulation of canonical Wnt signaling pathway            | 4650 | 27 | 61 | 2 | 0.07407407 | 0.04816532  | 1.317265554 | 0.085653598 | APOE_PIG,F1RM45_PIG           |
| GO:0090201 | negative regulation of release of cytochrome c from mitochondria  | 4650 | 8  | 16 | 2 | 0.25       | 0.000307129 | 3.512679763 | 0.02610593  | LMNA_PIG,F1SFG7_PIG           |
| GO:0006334 | nucleosome assembly                                               | 4650 | 20 | 16 | 2 | 0.1        | 0.002034471 | 2.691548587 | 0.086464999 | H4_PIG,A0A287BQW3_PIG         |
| GO:0098925 | retrograde trans-synaptic signaling by nitric oxide               | 4650 | 1  | 16 | 1 | 1          | 0.00344086  | 2.46333297  | 0.097491039 | A0A5G2QIK9_PIG                |
| GO:0007614 | short-term memory                                                 | 4650 | 1  | 16 | 1 | 1          | 0.00344086  | 2.46333297  | 0.07311828  | A0A287ALW7_PIG                |
| GO:1901987 | regulation of cell cycle phase transition                         | 4650 | 1  | 16 | 1 | 1          | 0.00344086  | 2.46333297  | 0.058494624 | A0A287A8H0_PIG                |
| GO:0034653 | retinoic acid catabolic process                                   | 4650 | 1  | 16 | 1 | 1          | 0.00344086  | 2.46333297  | 0.04874552  | B3F0B7_PIG                    |
| GO:0097749 | membrane tubulation                                               | 4650 | 2  | 16 | 1 | 0.5        | 0.006870618 | 2.163004166 | 0.083428939 | F1SFG7_PIG                    |
| GO:0090343 | positive regulation of cell aging                                 | 4650 | 2  | 16 | 1 | 0.5        | 0.006870618 | 2.163004166 | 0.073000321 | LMNA_PIG                      |
| GO:0010571 | positive regulation of nuclear cell cycle DNA replication         | 4650 | 2  | 16 | 1 | 0.5        | 0.006870618 | 2.163004166 | 0.064889175 | A0A287A8H0_PIG                |
| GO:0033306 | phytol metabolic process                                          | 4650 | 2  | 16 | 1 | 0.5        | 0.006870618 | 2.163004166 | 0.058400257 | I3L8Q5_PIG                    |
| GO:0010750 | positive regulation of nitric oxide mediated signal transduction  | 4650 | 2  | 16 | 1 | 0.5        | 0.006870618 | 2.163004166 | 0.053091143 | A0A5G2QIK9_PIG                |

|            |                                                                         |      |    |    |   |            |             |             |             |                         |
|------------|-------------------------------------------------------------------------|------|----|----|---|------------|-------------|-------------|-------------|-------------------------|
| GO:0000002 | mitochondrial genome maintenance                                        | 4650 | 2  | 16 | 1 | 0.5        | 0.006870618 | 2.163004166 | 0.048666881 | F1SFG7_PIG              |
| GO:1900114 | positive regulation of histone H3-K9 trimethylation                     | 4650 | 2  | 16 | 1 | 0.5        | 0.006870618 | 2.163004166 | 0.044923275 | LMNA_PIG                |
| GO:0035583 | sequestering of TGFbeta in extracellular matrix                         | 4650 | 2  | 16 | 1 | 0.5        | 0.006870618 | 2.163004166 | 0.041714469 | A0A286ZWQ1_PIG          |
| GO:1901388 | regulation of transforming growth factor beta activation                | 4650 | 2  | 16 | 1 | 0.5        | 0.006870618 | 2.163004166 | 0.038933505 | A0A286ZWQ1_PIG          |
| GO:2000463 | positive regulation of excitatory postsynaptic potential                | 4650 | 2  | 16 | 1 | 0.5        | 0.006870618 | 2.163004166 | 0.036500161 | A0A287ALW7_PIG          |
| GO:0006564 | L-serine biosynthetic process                                           | 4650 | 2  | 16 | 1 | 0.5        | 0.006870618 | 2.163004166 | 0.034353092 | SERA_PIG                |
| GO:0072201 | negative regulation of mesenchymal cell proliferation                   | 4650 | 3  | 16 | 1 | 0.33333333 | 0.010289308 | 1.987613821 | 0.0485884   | LMNA_PIG                |
| GO:1903243 | negative regulation of cardiac muscle hypertrophy in response to stress | 4650 | 3  | 16 | 1 | 0.33333333 | 0.010289308 | 1.987613821 | 0.046031116 | LMNA_PIG                |
| GO:2000647 | negative regulation of stem cell proliferation                          | 4650 | 4  | 16 | 1 | 0.25       | 0.013696963 | 1.86337572  | 0.058212092 | A0A5G2QCT3_PIG          |
| GO:0055015 | ventricular cardiac muscle cell development                             | 4650 | 4  | 16 | 1 | 0.25       | 0.013696963 | 1.86337572  | 0.055440088 | LMNA_PIG                |
| GO:0060087 | relaxation of vascular smooth muscle                                    | 4650 | 4  | 16 | 1 | 0.25       | 0.013696963 | 1.86337572  | 0.052920084 | A0A5G2QIK9_PIG          |
| GO:0030951 | establishment or maintenance of microtubule cytoskeleton polarity       | 4650 | 4  | 16 | 1 | 0.25       | 0.013696963 | 1.86337572  | 0.050619211 | LMNA_PIG                |
| GO:0007007 | inner mitochondrial membrane                                            | 4650 | 4  | 16 | 1 | 0.25       | 0.013696963 | 1.86337572  | 0.048510077 | F1SFG7_PIG              |
| GO:1900180 | regulation of protein localization to nucleus                           | 4650 | 4  | 16 | 1 | 0.25       | 0.013696963 | 1.86337572  | 0.046569674 | LMNA_PIG                |
| GO:0071310 | cellular response to organic substance                                  | 4650 | 4  | 16 | 1 | 0.25       | 0.013696963 | 1.86337572  | 0.044778533 | A0A287ALW7_PIG          |
| GO:0010628 | positive regulation of gene expression                                  | 4650 | 57 | 16 | 2 | 0.03508772 | 0.015868719 | 1.799458136 | 0.049957078 | LMNA_PIG,A0A287ALW7_PIG |
| GO:0031936 | negative regulation of chromatin silencing                              | 4650 | 5  | 16 | 1 | 0.2        | 0.017093616 | 1.767166066 | 0.051891333 | A0A287BQW3_PIG          |
| GO:0006352 | DNA-templated transcription                                             | 4650 | 5  | 16 | 1 | 0.2        | 0.017093616 | 1.767166066 | 0.050101977 | H4_PIG                  |
| GO:0030261 | chromosome condensation                                                 | 4650 | 5  | 16 | 1 | 0.2        | 0.017093616 | 1.767166066 | 0.048431911 | A0A287BQW3_PIG          |
| GO:0045910 | negative regulation of DNA recombination                                | 4650 | 5  | 16 | 1 | 0.2        | 0.017093616 | 1.767166066 | 0.046869591 | A0A287BQW3_PIG          |
| GO:0051965 | positive regulation of synapse assembly                                 | 4650 | 5  | 16 | 1 | 0.2        | 0.017093616 | 1.767166066 | 0.045404917 | A0A287ALW7_PIG          |
| GO:0044030 | regulation of DNA methylation                                           | 4650 | 5  | 16 | 1 | 0.2        | 0.017093616 | 1.767166066 | 0.04402901  | A0A287BQW3_PIG          |
| GO:0051259 | protein complex oligomerization                                         | 4650 | 5  | 16 | 1 | 0.2        | 0.017093616 | 1.767166066 | 0.042734039 | F1SFG7_PIG              |
| GO:0072378 | blood coagulation                                                       | 4650 | 5  | 16 | 1 | 0.2        | 0.017093616 | 1.767166066 | 0.041513067 | A0A5G2QCT3_PIG          |
| GO:0035904 | aorta development                                                       | 4650 | 6  | 16 | 1 | 0.16666667 | 0.0204793   | 1.6886849   | 0.048353902 | A0A286ZWQ1_PIG          |
| GO:0006520 | cellular amino acid metabolic process                                   | 4650 | 6  | 16 | 1 | 0.16666667 | 0.0204793   | 1.6886849   | 0.04704704  | SERA_PIG                |
| GO:0061003 | positive regulation of dendritic spine morphogenesis                    | 4650 | 6  | 16 | 1 | 0.16666667 | 0.0204793   | 1.6886849   | 0.04580896  | A0A287ALW7_PIG          |
| GO:0098532 | histone H3-K27 trimethylation                                           | 4650 | 6  | 16 | 1 | 0.16666667 | 0.0204793   | 1.6886849   | 0.044634371 | A0A287BQW3_PIG          |
| GO:0010971 | positive regulation of G2/M transition of mitotic cell cycle            | 4650 | 6  | 16 | 1 | 0.16666667 | 0.0204793   | 1.6886849   | 0.043518512 | A0A287A8H0_PIG          |
| GO:0060976 | coronary vasculature development                                        | 4650 | 6  | 16 | 1 | 0.16666667 | 0.0204793   | 1.6886849   | 0.042457085 | A0A286ZWQ1_PIG          |



|            |                                                                                                   |      |     |    |    |            |             |             |             |                                                                                                                                                                                                                                                                                                                                                                     |
|------------|---------------------------------------------------------------------------------------------------|------|-----|----|----|------------|-------------|-------------|-------------|---------------------------------------------------------------------------------------------------------------------------------------------------------------------------------------------------------------------------------------------------------------------------------------------------------------------------------------------------------------------|
| GO:0046849 | bone remodeling                                                                                   | 4650 | 6   | 16 | 1  | 0.16666667 | 0.0204793   | 1.6886849   | 0.041446202 | SPP24_PIG                                                                                                                                                                                                                                                                                                                                                           |
| GO:0008053 | mitochondrial fusion                                                                              | 4650 | 7   | 16 | 1  | 0.14285714 | 0.023854048 | 1.622437912 | 0.047153351 | F1SFG7_PIG                                                                                                                                                                                                                                                                                                                                                          |
| GO:0048285 | organelle fission                                                                                 | 4650 | 7   | 16 | 1  | 0.14285714 | 0.023854048 | 1.622437912 | 0.046081684 | F1SFG7_PIG                                                                                                                                                                                                                                                                                                                                                          |
| GO:0003429 | growth plate cartilage chondrocyte morphogenesis                                                  | 4650 | 7   | 16 | 1  | 0.14285714 | 0.023854048 | 1.622437912 | 0.045057646 | A0A287BLM4_PIG                                                                                                                                                                                                                                                                                                                                                      |
| GO:0006998 | nuclear envelope organization                                                                     | 4650 | 7   | 16 | 1  | 0.14285714 | 0.023854048 | 1.622437912 | 0.044078132 | LMNA_PIG                                                                                                                                                                                                                                                                                                                                                            |
| GO:2000146 | negative regulation of cell motility                                                              | 4650 | 7   | 16 | 1  | 0.14285714 | 0.023854048 | 1.622437912 | 0.043140299 | A0A5G2QCT3_PIG                                                                                                                                                                                                                                                                                                                                                      |
| GO:0016584 | nucleosome positioning                                                                            | 4650 | 8   | 16 | 1  | 0.125      | 0.027217894 | 1.565145488 | 0.048198353 | A0A287BQW3_PIG                                                                                                                                                                                                                                                                                                                                                      |
| GO:0090398 | cellular senescence                                                                               | 4650 | 8   | 16 | 1  | 0.125      | 0.027217894 | 1.565145488 | 0.047214713 | F1SFG7_PIG                                                                                                                                                                                                                                                                                                                                                          |
| GO:2000737 | negative regulation of stem cell differentiation                                                  | 4650 | 8   | 16 | 1  | 0.125      | 0.027217894 | 1.565145488 | 0.046270419 | A0A287BQW3_PIG                                                                                                                                                                                                                                                                                                                                                      |
| GO:2000679 | positive regulation of transcription regulatory region DNA binding                                | 4650 | 8   | 16 | 1  | 0.125      | 0.027217894 | 1.565145488 | 0.045363156 | A0A287BQW3_PIG                                                                                                                                                                                                                                                                                                                                                      |
| GO:1902236 | negative regulation of endoplasmic reticulum stress-induced intrinsic apoptotic signaling pathway | 4650 | 9   | 16 | 1  | 0.11111111 | 0.030570869 | 1.51469221  | 0.049971613 | F1SFG7_PIG                                                                                                                                                                                                                                                                                                                                                          |
| GO:0046039 | GTP metabolic process                                                                             | 4650 | 9   | 16 | 1  | 0.11111111 | 0.030570869 | 1.51469221  | 0.049028753 | F1SFG7_PIG                                                                                                                                                                                                                                                                                                                                                          |
| GO:0048193 | Golgi vesicle transport                                                                           | 4650 | 9   | 16 | 1  | 0.11111111 | 0.030570869 | 1.51469221  | 0.048120813 | A0A287ALW7_PIG                                                                                                                                                                                                                                                                                                                                                      |
| GO:0006355 | regulation of transcription                                                                       | 4650 | 85  | 16 | 2  | 0.02352941 | 0.033566014 | 1.474100222 | 0.05187475  | A0A287BQW3_PIG,A0A287ALW7_PIG                                                                                                                                                                                                                                                                                                                                       |
| GO:1900025 | negative regulation of substrate adhesion-dependent cell spreading                                | 4650 | 10  | 16 | 1  | 0.1        | 0.033913008 | 1.469633686 | 0.051475102 | A0A5G2QCT3_PIG                                                                                                                                                                                                                                                                                                                                                      |
| GO:0003281 | ventricular septum development                                                                    | 4650 | 10  | 16 | 1  | 0.1        | 0.033913008 | 1.469633686 | 0.05057203  | A0A286ZWQ1_PIG                                                                                                                                                                                                                                                                                                                                                      |
| GO:0034504 | protein localization to nucleus                                                                   | 4650 | 11  | 16 | 1  | 0.09090909 | 0.037244343 | 1.428939687 | 0.054582226 | LMNA_PIG                                                                                                                                                                                                                                                                                                                                                            |
| GO:0080182 | histone H3-K4 trimethylation                                                                      | 4650 | 11  | 16 | 1  | 0.09090909 | 0.037244343 | 1.428939687 | 0.053657104 | A0A287BQW3_PIG                                                                                                                                                                                                                                                                                                                                                      |
| GO:0061025 | membrane fusion                                                                                   | 4650 | 12  | 16 | 1  | 0.08333333 | 0.040564905 | 1.391849533 | 0.057466949 | F1SFG7_PIG                                                                                                                                                                                                                                                                                                                                                          |
| GO:0008217 | regulation of blood pressure                                                                      | 4650 | 12  | 16 | 1  | 0.08333333 | 0.040564905 | 1.391849533 | 0.056524868 | A0A5G2QIK9_PIG                                                                                                                                                                                                                                                                                                                                                      |
| GO:0006342 | chromatin silencing                                                                               | 4650 | 12  | 16 | 1  | 0.08333333 | 0.040564905 | 1.391849533 | 0.055613177 | A0A287BQW3_PIG                                                                                                                                                                                                                                                                                                                                                      |
| GO:0000266 | mitochondrial fission                                                                             | 4650 | 13  | 16 | 1  | 0.07692308 | 0.043874729 | 1.357785554 | 0.059196063 | F1SFG7_PIG                                                                                                                                                                                                                                                                                                                                                          |
| GO:0007601 | visual perception                                                                                 | 4650 | 14  | 16 | 1  | 0.07142857 | 0.047173846 | 1.326298719 | 0.062652764 | F1SFG7_PIG                                                                                                                                                                                                                                                                                                                                                          |
| GO:2001237 | negative regulation of extrinsic apoptotic signaling pathway                                      | 4650 | 14  | 16 | 1  | 0.07142857 | 0.047173846 | 1.326298719 | 0.061688875 | LMNA_PIG                                                                                                                                                                                                                                                                                                                                                            |
| GO:0005615 | extracellular space                                                                               | 4866 | 280 | 65 | 29 | 0.10357143 | 1.04E-19    | 18.98371833 | 7.99E-18    | F1SJB5_PIG,F1SCE4_PIG,HP T_PIG,APOE_PIG,F1RM45_PIG,A0A5G2QW05_PIG,A0A480MVF5_PIG,PG2_PIG,A0A5G2R7M4_PIG,Q0Z8R0_PIG,DM BT1_PIG,A0A287A3Z4_PIG,TIMP1_PIG,A0A287B5M2_PIG,A0A287B9R5_PIG,A0A287AT48_PIG,A7J149_PIG,F1SCC9_PIG,I3LQ76_PIG,A0A5G2R175_PIG,F1SUE4_PIG,F1S505_PIG,F1SMW6_PIG,A0A287B028_PIG,CATL1_PIG,PAI1_PIG,A0A287BF75_PIG,A0A075B7I9_PIG,A0A287AM82_PIG |
| GO:0005576 | extracellular region                                                                              | 4866 | 125 | 65 | 12 | 0.096      | 6.17E-08    | 7.20957262  | 2.38E-06    | HPT_PIG,A0A5S8KUU6_PIG,F1SFI6_PIG,A0A480MVF5_PIG,A0A287AFU9_PIG,OBP_PIG,LYSC1_PIG,LYSC3_PIG,TIMP1_PIG,S10AC_PIG,A0A5G2R175_PIG,F1S505_PIG                                                                                                                                                                                                                           |
| GO:0045095 | keratin filament                                                                                  | 4866 | 13  | 65 | 5  | 0.38461538 | 4.31E-07    | 6.365140407 | 1.11E-05    | A0A287A8E9_PIG,A0A287AG48_PIG,F1S0J8_PIG,A0A287BH52_PIG,A0A286ZL11_PIG                                                                                                                                                                                                                                                                                              |
| GO:0031012 | extracellular matrix                                                                              | 4866 | 44  | 65 | 6  | 0.13636364 | 2.13E-05    | 4.671117576 | 0.0004105   | APOE_PIG,F1RM45_PIG,DM BT1_PIG,TIMP1_PIG,A0A5G2R175_PIG,F1SUE4_PIG                                                                                                                                                                                                                                                                                                  |

|            |                                                                   |      |     |    |   |            |             |             |             |                                                                                                                    |
|------------|-------------------------------------------------------------------|------|-----|----|---|------------|-------------|-------------|-------------|--------------------------------------------------------------------------------------------------------------------|
| GO:0120001 | apical plasma membrane urothelial plaque                          | 4866 | 3   | 65 | 2 | 0.66666667 | 0.000522629 | 3.281806724 | 0.008048482 | A0A5G2R1T5_PIG,F6Q8K1_PIG                                                                                          |
| GO:0034363 | intermediate-density lipoprotein particle                         | 4866 | 4   | 65 | 2 | 0.5        | 0.00103624  | 2.984539551 | 0.013298416 | APOE_PIG,F1RM45_PIG                                                                                                |
| GO:0043083 | synaptic cleft                                                    | 4866 | 4   | 65 | 2 | 0.5        | 0.00103624  | 2.984539551 | 0.011398643 | APOE_PIG,F1RM45_PIG                                                                                                |
| GO:0034362 | low-density lipoprotein particle                                  | 4866 | 5   | 65 | 2 | 0.4        | 0.001712182 | 2.766450076 | 0.016479752 | APOE_PIG,F1RM45_PIG                                                                                                |
| GO:0005882 | intermediate filament                                             | 4866 | 20  | 65 | 3 | 0.15       | 0.002205124 | 2.656566996 | 0.01886606  | A0A287A8E9_PIG,F1S0J8_PIG,A0A5G2QXD3_PIG                                                                           |
| GO:0034364 | high-density lipoprotein particle                                 | 4866 | 7   | 65 | 2 | 0.28571429 | 0.003533958 | 2.451738649 | 0.027211475 | APOE_PIG,F1RM45_PIG                                                                                                |
| GO:0042627 | chylomicron                                                       | 4866 | 9   | 65 | 2 | 0.22222222 | 0.005954578 | 2.225149002 | 0.041682047 | APOE_PIG,F1RM45_PIG                                                                                                |
| GO:0034361 | very-low-density lipoprotein particle                             | 4866 | 12  | 65 | 2 | 0.16666667 | 0.010638468 | 1.973120903 | 0.068263504 | APOE_PIG,F1RM45_PIG                                                                                                |
| GO:0031232 | extrinsic component of external side of plasma membrane           | 4866 | 1   | 65 | 1 | 1          | 0.013357994 | 1.874258748 | 0.079120427 | F1SJB5_PIG                                                                                                         |
| GO:0120003 | hinge region between urothelial plaques of apical plasma membrane | 4866 | 1   | 65 | 1 | 1          | 0.013357994 | 1.874258748 | 0.073468968 | F1SU64_PIG                                                                                                         |
| GO:0016323 | basolateral plasma membrane                                       | 4866 | 41  | 65 | 3 | 0.07317073 | 0.01689894  | 1.772140535 | 0.086747892 | F1SJB5_PIG,A0A5S6HMA0_PIG,A0A287ALK8_PIG                                                                           |
| GO:0031090 | organelle membrane                                                | 4866 | 2   | 65 | 1 | 0.5        | 0.026540262 | 1.576094802 | 0.127725009 | A0A5S6HMA0_PIG                                                                                                     |
| GO:0030658 | transport vesicle membrane                                        | 4866 | 2   | 65 | 1 | 0.5        | 0.026540262 | 1.576094802 | 0.120211773 | DMBT1_PIG                                                                                                          |
| GO:0016328 | lateral plasma membrane                                           | 4866 | 20  | 65 | 2 | 0.1        | 0.028598734 | 1.543653188 | 0.12233903  | F1SJB5_PIG,A0A5S6HMA0_PIG                                                                                          |
| GO:0042383 | sarcolemma                                                        | 4866 | 22  | 65 | 2 | 0.09090909 | 0.034182715 | 1.466193449 | 0.138529949 | A0A287A8E9_PIG,F1SJB5_PIG                                                                                          |
| GO:0070695 | FHF complex                                                       | 4866 | 3   | 65 | 1 | 0.33333333 | 0.039549078 | 1.402863637 | 0.15226395  | A0A287BM99_PIG                                                                                                     |
| GO:0005890 | sodium                                                            | 4866 | 3   | 65 | 1 | 0.33333333 | 0.039549078 | 1.402863637 | 0.145013286 | A0A5S6HMA0_PIG                                                                                                     |
| GO:0062023 | collagen-containing extracellular                                 | 4866 | 44  | 16 | 3 | 0.06818182 | 0.000355921 | 3.448646677 | 0.016372355 | A0A287BLM4_PIG,A0A286Z WQ1_PIG,A0A5G2QCT3_PIG                                                                      |
| GO:0000786 | nucleosome                                                        | 4866 | 15  | 16 | 2 | 0.13333333 | 0.001038263 | 2.983692699 | 0.023880045 | H4_PIG,A0A287BQW3_PIG                                                                                              |
| GO:0031431 | Dbf4-dependent protein kinase complex                             | 4866 | 1   | 16 | 1 | 1          | 0.003288122 | 2.483052122 | 0.050417865 | A0A287A8H0_PIG                                                                                                     |
| GO:0008074 | guanylate cyclase complex                                         | 4866 | 1   | 16 | 1 | 1          | 0.003288122 | 2.483052122 | 0.037813399 | A0A5G2QIK9_PIG                                                                                                     |
| GO:0030061 | mitochondrial crista                                              | 4866 | 2   | 16 | 1 | 0.5        | 0.006566105 | 2.182692162 | 0.060408168 | F1SFG7_PIG                                                                                                         |
| GO:0042025 | host cell nucleus                                                 | 4866 | 48  | 16 | 2 | 0.04166667 | 0.010470605 | 1.980028212 | 0.08027464  | H4_PIG,A0A287BQW3_PIG                                                                                              |
| GO:0005638 | lamin filament                                                    | 4866 | 4   | 16 | 1 | 0.25       | 0.013091775 | 1.883001476 | 0.086031662 | LMNA_PIG                                                                                                           |
| GO:0071953 | elastic fiber                                                     | 4866 | 4   | 16 | 1 | 0.25       | 0.013091775 | 1.883001476 | 0.075277705 | A0A5G2QCT3_PIG                                                                                                     |
| GO:0001527 | microfibril                                                       | 4866 | 6   | 16 | 1 | 0.16666667 | 0.019577241 | 1.708248513 | 0.100061454 | A0A286Z WQ1_PIG                                                                                                    |
| GO:0016604 | nuclear body                                                      | 4866 | 76  | 16 | 2 | 0.02631579 | 0.025077284 | 1.600719498 | 0.115355507 | LMNA_PIG,A0A287BQW3_PIG                                                                                            |
| GO:0098982 | GABA-ergic synapse                                                | 4866 | 8   | 16 | 1 | 0.125      | 0.026022735 | 1.584647056 | 0.108822348 | A0A5G2QIK9_PIG                                                                                                     |
| GO:0016235 | aggresome                                                         | 4866 | 12  | 16 | 1 | 0.08333333 | 0.038794727 | 1.4112273   | 0.14871312  | A0A287A8H0_PIG                                                                                                     |
| GO:0005719 | nuclear euchromatin                                               | 4866 | 13  | 16 | 1 | 0.07692308 | 0.0419631   | 1.377132432 | 0.148484817 | A0A287BQW3_PIG                                                                                                     |
| GO:0005720 | nuclear heterochromatin                                           | 4866 | 13  | 16 | 1 | 0.07692308 | 0.0419631   | 1.377132432 | 0.137878758 | A0A287BQW3_PIG                                                                                                     |
| GO:0030126 | COPI vesicle coat                                                 | 4866 | 13  | 16 | 1 | 0.07692308 | 0.0419631   | 1.377132432 | 0.128686841 | A0A481CG38_PIG                                                                                                     |
| GO:0000139 | Golgi membrane                                                    | 4866 | 104 | 16 | 2 | 0.01923077 | 0.044680327 | 1.349883662 | 0.128455939 | A0A481CG38_PIG,A0A287AL W7_PIG                                                                                     |
| GO:0004867 | serine-type endopeptidase inhibitor activity                      | 4452 | 49  | 62 | 9 | 0.18367347 | 1.44E-08    | 7.84166315  | 1.57E-06    | F1SCE4_PIG,A0A480MVF5_PIG,A0A287B9R5_PIG,A0A287 AT48_PIG,F1SCC9_PIG,I3LQ 76_PIG,F1SMW6_PIG,PAI1_PIG,A0A287BF75_PIG |
| GO:0008191 | metalloendopeptidase inhibitor                                    | 4452 | 6   | 62 | 3 | 0.5        | 4.99E-05    | 4.301486986 | 0.002722134 | F1SFI6_PIG,TIMP1_PIG,A0A5 G2R175_PIG                                                                               |
| GO:0016209 | antioxidant activity                                              | 4452 | 7   | 62 | 3 | 0.42857143 | 8.65E-05    | 4.062783633 | 0.003144283 | HPT_PIG,APOE_PIG,F1RM45_PIG                                                                                        |
| GO:0046911 | metal chelating activity                                          | 4452 | 2   | 62 | 2 | 1          | 0.000190857 | 3.719291225 | 0.005200861 | APOE_PIG,F1RM45_PIG                                                                                                |
| GO:0036094 | small molecule binding                                            | 4452 | 9   | 62 | 3 | 0.33333333 | 0.000203594 | 3.691235274 | 0.004438347 | A0A5S6HQ91_PIG,OBP_PIG, F1SG31_PIG                                                                                 |
| GO:0050750 | low-density lipoprotein particle receptor binding                 | 4452 | 12  | 62 | 3 | 0.25       | 0.000517524 | 3.2860698   | 0.00940168  | A0A287AFA5_PIG,APOE_PIG, F1RM45_PIG                                                                                |
| GO:0071813 | lipoprotein particle binding                                      | 4452 | 3   | 62 | 2 | 0.66666667 | 0.000567425 | 3.246091392 | 0.008835621 | APOE_PIG,F1RM45_PIG                                                                                                |
| GO:0003796 | lysozyme activity                                                 | 4452 | 3   | 62 | 2 | 0.66666667 | 0.000567425 | 3.246091392 | 0.007731168 | LYSC1_PIG,LYSC3_PIG                                                                                                |

|            |                                                                 |      |     |    |   |            |             |             |             |                                                                                 |
|------------|-----------------------------------------------------------------|------|-----|----|---|------------|-------------|-------------|-------------|---------------------------------------------------------------------------------|
| GO:0070326 | very-low-density lipoprotein particle receptor binding          | 4452 | 3   | 62 | 2 | 0.66666667 | 0.000567425 | 3.246091392 | 0.006872149 | APOE_PIG,FIRM45_PIG                                                             |
| GO:0002020 | protease binding                                                | 4452 | 32  | 62 | 4 | 0.125      | 0.000915901 | 3.038151344 | 0.009983324 | Q0Z8R0_PIG,TIMP1_PIG,A0A5G2R175_PIG,PAI1_PIG                                    |
| GO:0001540 | amyloid-beta binding                                            | 4452 | 16  | 62 | 3 | 0.1875     | 0.001265968 | 2.897577354 | 0.01254459  | APOE_PIG,FIRM45_PIG,Q0Z8R0_PIG                                                  |
| GO:0060228 | phosphatidylcholine-sterol O-acyltransferase activator activity | 4452 | 5   | 62 | 2 | 0.4        | 0.001857616 | 2.731044063 | 0.016873345 | APOE_PIG,FIRM45_PIG                                                             |
| GO:0043395 | heparan sulfate proteoglycan binding                            | 4452 | 5   | 62 | 2 | 0.4        | 0.001857616 | 2.731044063 | 0.015575395 | APOE_PIG,FIRM45_PIG                                                             |
| GO:0008289 | lipid binding                                                   | 4452 | 41  | 62 | 4 | 0.09756098 | 0.002349    | 2.629117073 | 0.018288639 | APOE_PIG,FIRM45_PIG,A7J149_PIG,FIS505_PIG                                       |
| GO:0120020 | cholesterol transfer activity                                   | 4452 | 10  | 62 | 2 | 0.2        | 0.00799203  | 2.097342905 | 0.058075417 | APOE_PIG,FIRM45_PIG                                                             |
| GO:0048156 | tau protein binding                                             | 4452 | 12  | 62 | 2 | 0.16666667 | 0.011513599 | 1.938788914 | 0.078436391 | APOE_PIG,FIRM45_PIG                                                             |
| GO:0001671 | ATPase activator activity                                       | 4452 | 12  | 62 | 2 | 0.16666667 | 0.011513599 | 1.938788914 | 0.073822485 | A0A5S6HMA0_PIG,A0A287A GQ8_PIG                                                  |
| GO:0004866 | endopeptidase inhibitor activity                                | 4452 | 12  | 62 | 2 | 0.16666667 | 0.011513599 | 1.938788914 | 0.069721236 | F1SFI6_PIG,A0A480MV5_PIG                                                        |
| GO:0001530 | lipopolysaccharide binding                                      | 4452 | 13  | 62 | 2 | 0.15384615 | 0.013485868 | 1.870121108 | 0.077366293 | PG2_PIG,A0A287B028_PIG                                                          |
| GO:0004869 | cysteine-type endopeptidase inhibitor activity                  | 4452 | 13  | 62 | 2 | 0.15384615 | 0.013485868 | 1.870121108 | 0.073497978 | F1SFI6_PIG,Q0Z8R0_PIG                                                           |
| GO:0030197 | extracellular matrix constituent                                | 4452 | 1   | 62 | 1 | 1          | 0.013926325 | 1.856163466 | 0.07228426  | A0A287B5M2_PIG                                                                  |
| GO:0019841 | retinol binding                                                 | 4452 | 1   | 62 | 1 | 1          | 0.013926325 | 1.856163466 | 0.068998611 | A0A287A3Z4_PIG                                                                  |
| GO:0004021 | L-alanine                                                       | 4452 | 1   | 62 | 1 | 1          | 0.013926325 | 1.856163466 | 0.065998672 | F1RP04_PIG                                                                      |
| GO:0019911 | structural constituent of myelin sheath                         | 4452 | 1   | 62 | 1 | 1          | 0.013926325 | 1.856163466 | 0.063248727 | F1SU64_PIG                                                                      |
| GO:0019863 | IgE binding                                                     | 4452 | 1   | 62 | 1 | 1          | 0.013926325 | 1.856163466 | 0.060718778 | A0A5G2R7M4_PIG                                                                  |
| GO:0036041 | long-chain fatty acid binding                                   | 4452 | 1   | 62 | 1 | 1          | 0.013926325 | 1.856163466 | 0.05838344  | FABP4_PIG                                                                       |
| GO:0051427 | hormone receptor binding                                        | 4452 | 1   | 62 | 1 | 1          | 0.013926325 | 1.856163466 | 0.056221091 | FABP4_PIG                                                                       |
| GO:0016918 | retinal binding                                                 | 4452 | 1   | 62 | 1 | 1          | 0.013926325 | 1.856163466 | 0.054213195 | A0A287A3Z4_PIG                                                                  |
| GO:0005509 | calcium ion binding                                             | 4452 | 196 | 62 | 7 | 0.03571429 | 0.018181789 | 1.740363379 | 0.068338449 | F1SJB5_PIG,I3L7Z6_PIG,A0A287ALK8_PIG,S10AC_PIG,K7GQ50_PIG,F1RYW2_PIG,F1SUE4_PIG |
| GO:0034632 | retinol transmembrane transporter activity                      | 4452 | 2   | 62 | 1 | 0.5        | 0.027661793 | 1.55811967  | 0.100504515 | A0A287A3Z4_PIG                                                                  |
| GO:0005372 | water transmembrane transporter activity                        | 4452 | 2   | 62 | 1 | 0.5        | 0.027661793 | 1.55811967  | 0.097262434 | F1RPU5_PIG                                                                      |
| GO:0004322 | ferroxidase activity                                            | 4452 | 2   | 62 | 1 | 0.5        | 0.027661793 | 1.55811967  | 0.094222983 | A0A5G2QW05_PIG                                                                  |
| GO:0097655 | serpin family protein binding                                   | 4452 | 2   | 62 | 1 | 0.5        | 0.027661793 | 1.55811967  | 0.091367741 | CATL1_PIG                                                                       |
| GO:0070891 | lipoteichoic acid binding                                       | 4452 | 2   | 62 | 1 | 0.5        | 0.027661793 | 1.55811967  | 0.088680455 | A0A287B028_PIG                                                                  |
| GO:0004859 | phospholipase inhibitor activity                                | 4452 | 2   | 62 | 1 | 0.5        | 0.027661793 | 1.55811967  | 0.086146727 | F1SJB5_PIG                                                                      |
| GO:0015204 | urea transmembrane transporter activity                         | 4452 | 2   | 62 | 1 | 0.5        | 0.027661793 | 1.55811967  | 0.083753763 | F1RPU5_PIG                                                                      |
| GO:0015265 | urea channel activity                                           | 4452 | 2   | 62 | 1 | 0.5        | 0.027661793 | 1.55811967  | 0.081490148 | F1RPU5_PIG                                                                      |
| GO:0071723 | lipopeptide binding                                             | 4452 | 2   | 62 | 1 | 0.5        | 0.027661793 | 1.55811967  | 0.07934567  | A0A287B028_PIG                                                                  |
| GO:0005501 | retinoid binding                                                | 4452 | 2   | 62 | 1 | 0.5        | 0.027661793 | 1.55811967  | 0.077311166 | A0A287A3Z4_PIG                                                                  |
| GO:0030492 | hemoglobin binding                                              | 4452 | 2   | 62 | 1 | 0.5        | 0.027661793 | 1.55811967  | 0.075378386 | HPT_PIG                                                                         |
| GO:0008483 | transaminase activity                                           | 4452 | 2   | 62 | 1 | 0.5        | 0.027661793 | 1.55811967  | 0.073539889 | F1RP04_PIG                                                                      |
| GO:0035375 | zymogen binding                                                 | 4452 | 2   | 62 | 1 | 0.5        | 0.027661793 | 1.55811967  | 0.071788939 | DMBT1_PIG                                                                       |
| GO:0005198 | structural molecule activity                                    | 4452 | 50  | 62 | 3 | 0.06       | 0.03170887  | 1.49881924  | 0.080378297 | F1RK90_PIG,F1S0J8_PIG,A0A5G2QXD3_PIG                                            |
| GO:0097110 | scaffold protein binding                                        | 4452 | 23  | 62 | 2 | 0.08695652 | 0.040021515 | 1.397706477 | 0.099144207 | A0A287A8E9_PIG,A0A287BH52_PIG                                                   |
| GO:0048306 | calcium-dependent protein binding                               | 4452 | 23  | 62 | 2 | 0.08695652 | 0.040021515 | 1.397706477 | 0.096941003 | F1SJB5_PIG,I3L7Z6_PIG                                                           |
| GO:0050786 | RAGE receptor binding                                           | 4452 | 3   | 62 | 1 | 0.33333333 | 0.041208977 | 1.385008164 | 0.097647359 | S10AC_PIG                                                                       |
| GO:0005391 | sodium                                                          | 4452 | 3   | 62 | 1 | 0.33333333 | 0.041208977 | 1.385008164 | 0.095569756 | A0A5S6HMA0_PIG                                                                  |
| GO:0030414 | peptidase inhibitor activity                                    | 4452 | 3   | 62 | 1 | 0.33333333 | 0.041208977 | 1.385008164 | 0.093578719 | A0A480MV5_PIG                                                                   |
| GO:0008199 | ferric iron binding                                             | 4452 | 3   | 62 | 1 | 0.33333333 | 0.041208977 | 1.385008164 | 0.091668949 | A0A5S8KUU6_PIG                                                                  |
| GO:0005176 | ErbB-2 class receptor binding                                   | 4452 | 3   | 62 | 1 | 0.33333333 | 0.041208977 | 1.385008164 | 0.08983557  | A0A287B5M2_PIG                                                                  |

|            |                                                    |      |    |    |   |            |             |             |             |                       |
|------------|----------------------------------------------------|------|----|----|---|------------|-------------|-------------|-------------|-----------------------|
| GO:0019834 | phospholipase A2 inhibitor activity                | 4452 | 3  | 62 | 1 | 0.33333333 | 0.041208977 | 1.385008164 | 0.088074089 | F1SJB5_PIG            |
| GO:0004617 | phosphoglycerate dehydrogenase activity            | 4452 | 1  | 13 | 1 | 1          | 0.002920036 | 2.534611803 | 0.113881402 | SERA_PIG              |
| GO:0001972 | retinoic acid binding                              | 4452 | 1  | 13 | 1 | 1          | 0.002920036 | 2.534611803 | 0.056940701 | B3F0B7_PIG            |
| GO:0050436 | microfibril binding                                | 4452 | 2  | 13 | 1 | 0.5        | 0.005832199 | 2.234167637 | 0.075818592 | A0A286ZWQ1_PIG        |
| GO:0030060 | L-malate dehydrogenase activity                    | 4452 | 3  | 13 | 1 | 0.33333333 | 0.00873651  | 2.058662031 | 0.085180971 | SERA_PIG              |
| GO:0003680 | AT DNA binding                                     | 4452 | 4  | 13 | 1 | 0.25       | 0.011632987 | 1.934308771 | 0.090737296 | A0A287BQW3_PIG        |
| GO:1901612 | cardiolipin binding                                | 4452 | 4  | 13 | 1 | 0.25       | 0.011632987 | 1.934308771 | 0.075614413 | F1SFG7_PIG            |
| GO:0019166 | trans-2-enoyl-CoA reductase (NADPH) activity       | 4452 | 4  | 13 | 1 | 0.25       | 0.011632987 | 1.934308771 | 0.064812354 | I3L8Q5_PIG            |
| GO:0004383 | guanylate cyclase activity                         | 4452 | 4  | 13 | 1 | 0.25       | 0.011632987 | 1.934308771 | 0.05671081  | A0A5G2QIK9_PIG        |
| GO:0070051 | fibrinogen binding                                 | 4452 | 4  | 13 | 1 | 0.25       | 0.011632987 | 1.934308771 | 0.050409609 | A0A5G2QCT3_PIG        |
| GO:0050431 | transforming growth factor beta binding            | 4452 | 6  | 13 | 1 | 0.16666667 | 0.017402517 | 1.759387936 | 0.067869816 | A0A286ZWQ1_PIG        |
| GO:0070300 | phosphatidic acid binding                          | 4452 | 7  | 13 | 1 | 0.14285714 | 0.020275609 | 1.693026093 | 0.07188625  | F1SFG7_PIG            |
| GO:0046982 | protein heterodimerization activity                | 4452 | 82 | 13 | 2 | 0.02439024 | 0.022917882 | 1.639825528 | 0.074483115 | H4_PIG,A0A287BQW3_PIG |
| GO:0016504 | peptidase activator activity                       | 4452 | 8  | 13 | 1 | 0.125      | 0.023140945 | 1.635618917 | 0.069422834 | A0A5G2QCT3_PIG        |
| GO:0005540 | hyaluronic acid binding                            | 4452 | 8  | 13 | 1 | 0.125      | 0.023140945 | 1.635618917 | 0.06446406  | FIREZ1_PIG            |
| GO:0031492 | nucleosomal DNA binding                            | 4452 | 9  | 13 | 1 | 0.11111111 | 0.025998543 | 1.585050988 | 0.067596212 | A0A287BQW3_PIG        |
| GO:0043539 | protein serine/threonine kinase activator activity | 4452 | 11 | 13 | 1 | 0.09090909 | 0.031690605 | 1.499069467 | 0.07724585  | A0A287A8H0_PIG        |
| GO:0001968 | fibronectin binding                                | 4452 | 11 | 13 | 1 | 0.09090909 | 0.031690605 | 1.499069467 | 0.072701977 | A0A5G2QCT3_PIG        |
| GO:0003690 | double-stranded DNA binding                        | 4452 | 14 | 13 | 1 | 0.07142857 | 0.040171147 | 1.396085769 | 0.087037485 | A0A287BQW3_PIG        |
